# Supplementary material for: Histone deacetylase 6 regulates cytokinesis and erythrocyte enucleation through deacetylation of formin protein mDia2
Source: PubMed Central journal article supplement — Haematologica. 2017 Jun;102(6):984–94. doi: 10.3324/haematol.2016.161513 (PMC5451330; doi:10.3324/haematol.2016.161513), 2017-06
Supplement: 2016_161513-Disclosures_and_Contributions.pdf [file 2016_161513-Disclosures_and_Contributions.pdf]

Haematologica  
HAEMATOL/2016/161513  
Version 3

Histone deacetylase 6 regulates cytokinesis and erythrocyte  
enucleation through deacetylation of formin protein mDia2

Xuehui Li, Yang Mei, Bowen Yan, Eric Vitriol, Suming Huang, Peng Ji,  
and Yi Qiu

Disclosures: This work was supported by the National Institutes of Health (R01 HL095674 to Y.Q.; R01 DK102718 to P.J. and R01 DK110108 to S.H) and Department of Defense grant CA140119 (P.J.). The authors declare no competing financial interests

Contributions: X.L. designed and performed the experiments, analyzed the data, and wrote the manuscript; Y.M and B.Y. performed the experiments and analyzed the data; E.V. and S.H. interpreted the data; P.J. interpreted the data and edit the manuscript; Y.Q. designed and supervised the project, interpreted data and wrote the manuscript.
