# Supplementary material for: Histone deacetylase 6 regulates cytokinesis and erythrocyte enucleation through deacetylation of formin protein mDia2
Source: PubMed Central journal article supplement — Haematologica. 2017 Jun;102(6):984–94. doi: 10.3324/haematol.2016.161513 (PMC5451330; doi:10.3324/haematol.2016.161513), 2017-06

# Histone deacetylase 6 regulates cytokinesis and erythrocyte enucleation through deacetylation of formin protein mDia2

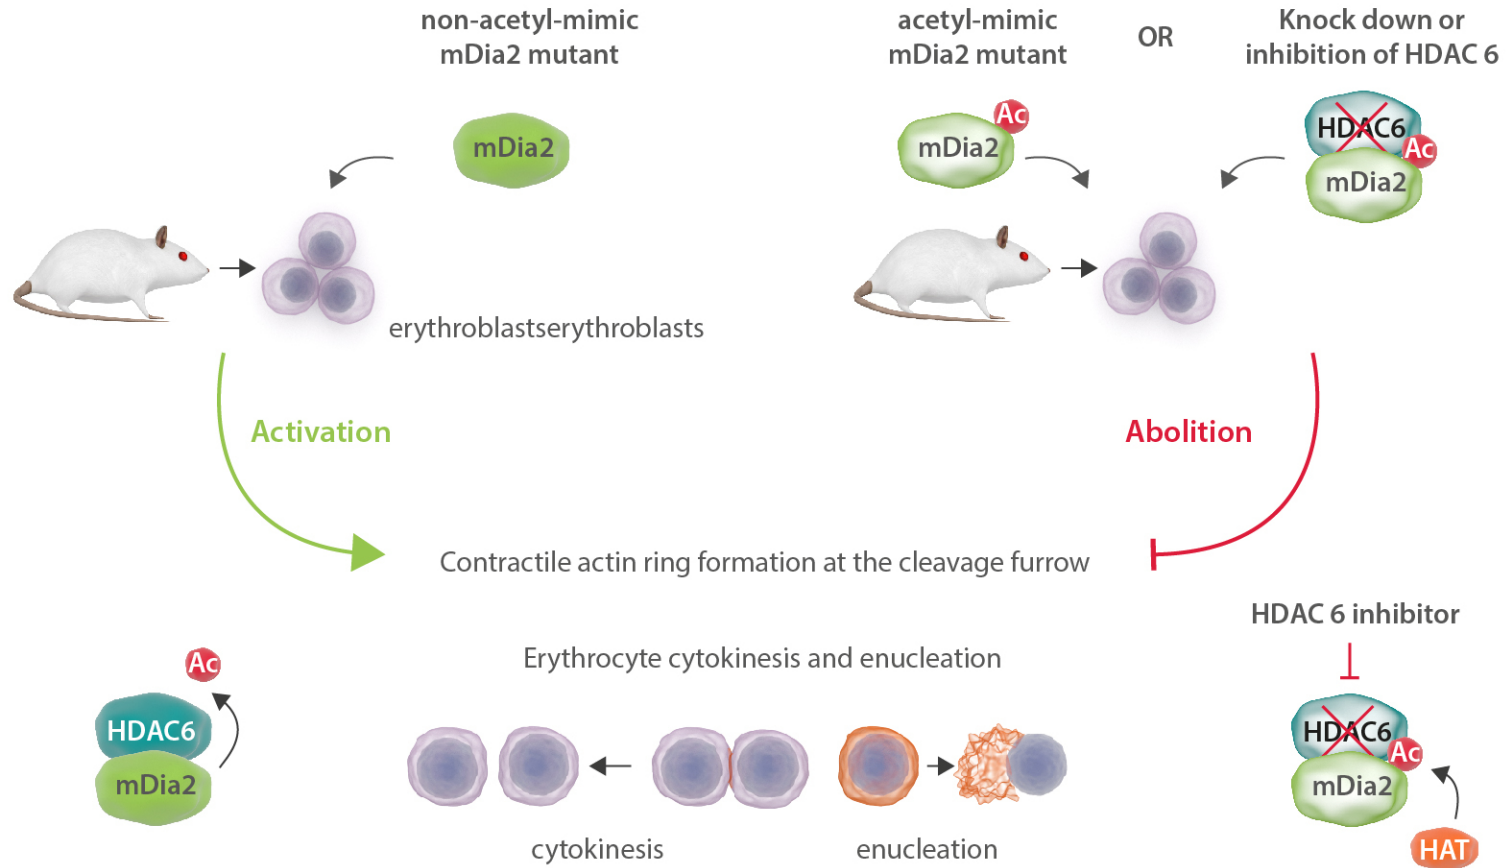

Supplement: GA_HAEMATOL-2016-161513v3-Li-01.pdf [file GA_HAEMATOL-2016-161513v3-Li-01.pdf]
